# Supplementary material for: Standardization of Body Composition Status in Patients with Advanced Urothelial Tumors: The Role of a CT-Based AI-Powered Software for the Assessment of Sarcopenia and Patient Outcome Correlation
Source: MDPI journal article supplement (doi:10.3390/cancers15112968), 2023-05-29
Supplement: s1 [file s1]

# Supplementary Figures

Figure S1 A – S1 B.

Univariable linear regression plots depicting AI-based Quantib Body Composition® Skeletal Muscle Index (SMI-L3) and anthropomorphic sarcopenia-related variables at baseline (A).

Multivariable linear regression model assessing SMI-L3, clinic-demographic and anthropomorphic sarcopenia-related variables at baseline (B).

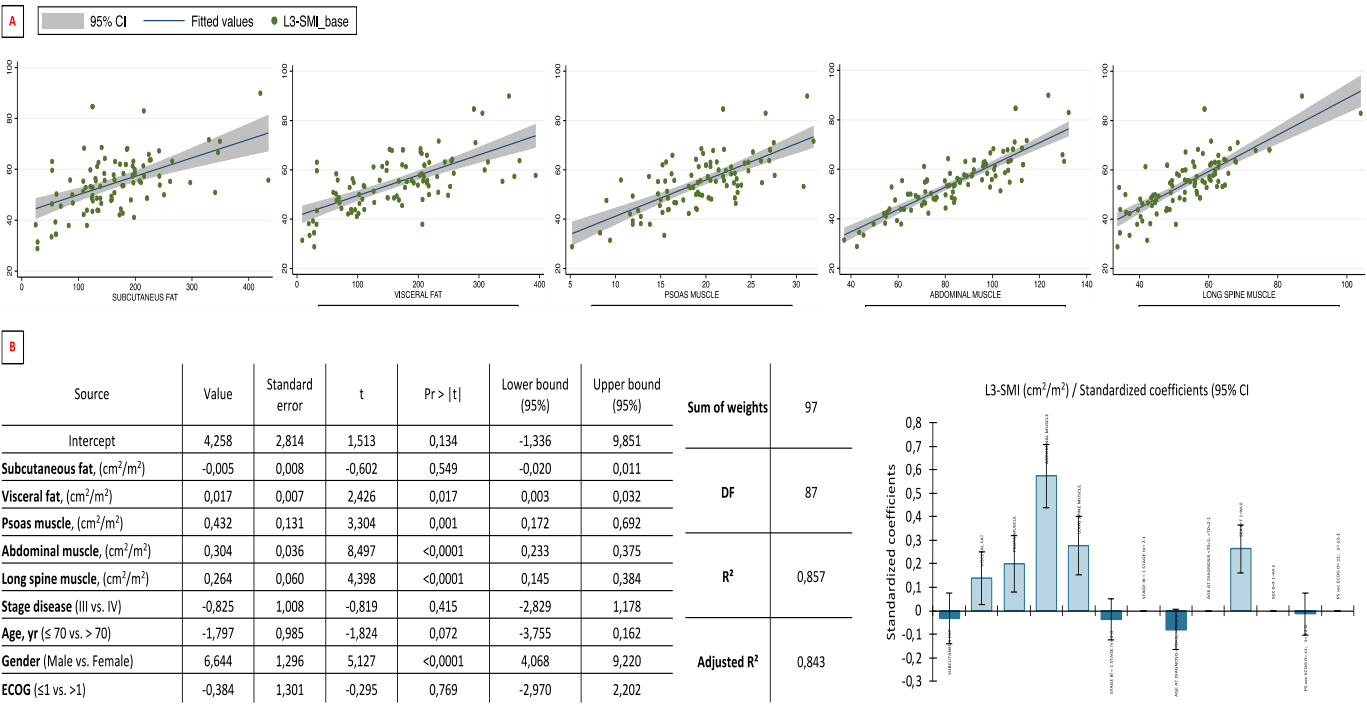

**Figure S2 A - B.**

Univariable linear regression plots depicting AI-based Quantib Body Composition® Skeletal Muscle Index (SMI-L3) and anthropomorphic sarcopenia-related variables after fist therapy cycle (A). Multivariable linear regression model assessing SMI-L3, clinic-demographic and anthropomorphic sarcopenia-related variables after fist therapy cycle (B).

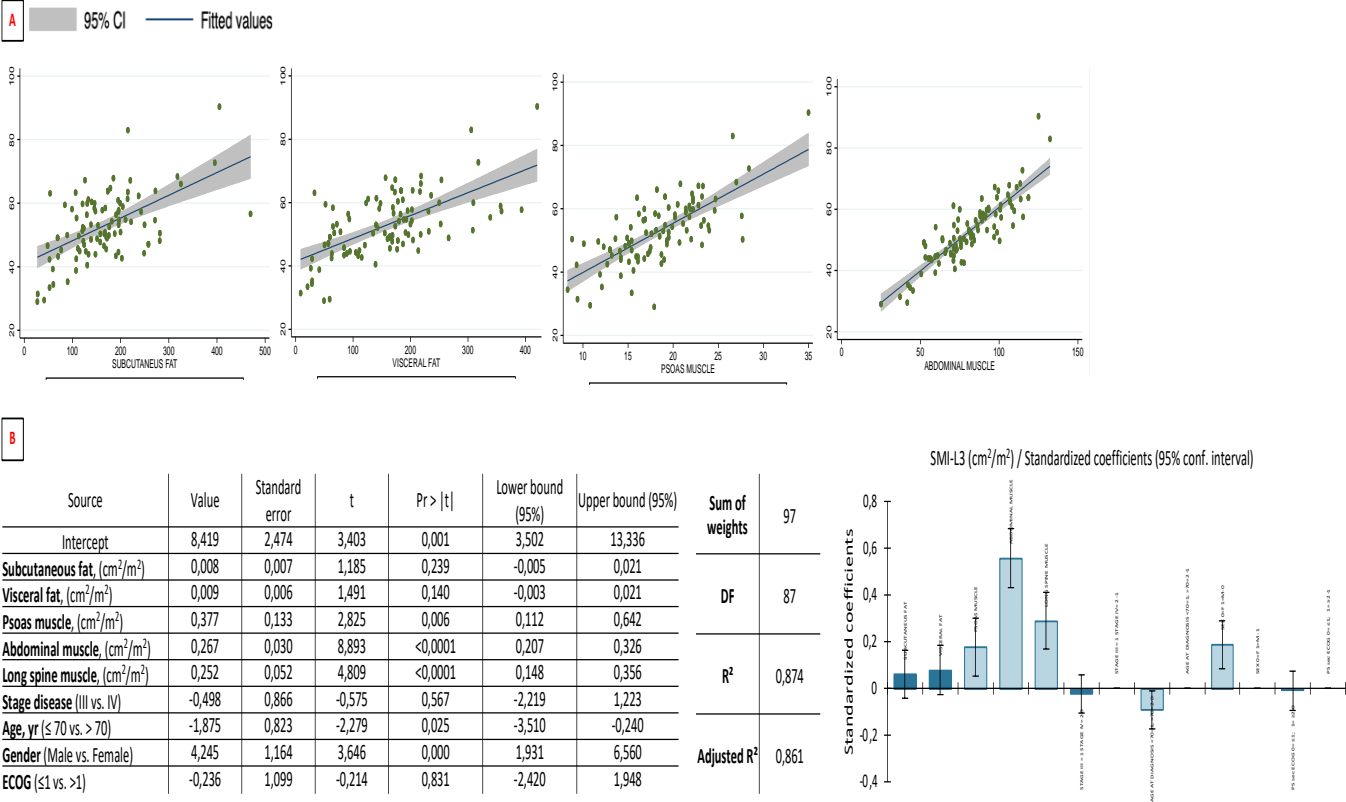

Bivariable and Multivariable adjusted Cox regression modeling for anthropometric measures assessing the Odds Ratio for overall survival at baseline (A) and post-systemic treatment (B).

| A                                                        |            | Bivariable analysis* |              | Multivariable analysis** |              |
|----------------------------------------------------------|------------|----------------------|--------------|--------------------------|--------------|
| Continuous and categorical variables                     |            | aOR (95%CI)          | P value      | aOR (95%CI)              | P value      |
| <b>SMI-L3, (cm<sup>2</sup>/m<sup>2</sup>)</b>            | Continuous | 0.96 (0.92 – 1.1)    | 0.058        | 0.95 (0.91 – 0.99)       | <b>0.047</b> |
| <b>Sarcopenic status, by SMI-L3</b>                      | No         | Ref.                 |              | Ref.                     |              |
|                                                          | Yes        | 2.33 (0.99 – 5.52)   | 0.054        | 2.63 (1.05 – 6.61)       | <b>0.039</b> |
| <b>Subcutaneous fat, (cm<sup>2</sup>/m<sup>2</sup>)</b>  | Continuous | 0.99 (0.98 – 0.99)   | <b>0.027</b> | 0.99 (0.98 – 0.99)       | <b>0.023</b> |
| <b>Subcutaneous fat, (cm<sup>2</sup>/m<sup>2</sup>)</b>  | > Q1       | Ref.                 |              | Ref.                     |              |
|                                                          | ≤ Q1       | 2.64 (1.07 – 6.92)   | <b>0.048</b> | 2.84 (1.02 – 7.86)       | <b>0.044</b> |
| <b>Visceral fat, (cm<sup>2</sup>/m<sup>2</sup>)</b>      | Continuous | 0.99 (0.99 – 1.00)   | 0.110        | 0.99 (0.98 – 1.00)       | 0.079        |
| <b>Visceral fat, (cm<sup>2</sup>/m<sup>2</sup>)</b>      | > Q1       | Ref.                 |              | Ref.                     |              |
|                                                          | ≤ Q1       | 2.71 (0.92 – 7.93)   | 0.068        | 2.91 (0.97 – 8.72)       | 0.056        |
| <b>Psoas muscle, (cm<sup>2</sup>/m<sup>2</sup>)</b>      | Continuous | 0.90 (0.82 – 0.99)   | <b>0.026</b> | 0.90 (0.81 – 0.99)       | <b>0.040</b> |
| <b>Psoas muscle, (cm<sup>2</sup>/m<sup>2</sup>)</b>      | > Q1       | Ref.                 |              | Ref.                     |              |
|                                                          | ≤ Q1       | 3.09 (0.91 – 10.51)  | 0.070        | 2.95 (0.97 – 8.95)       | 0.055        |
| <b>Abdominal muscle, (cm<sup>2</sup>/m<sup>2</sup>)</b>  | Continuous | 0.97 (0.95 – 1.00)   | <b>0.021</b> | 0.96 (0.94 – 0.99)       | <b>0.015</b> |
| <b>Abdominal muscle, (cm<sup>2</sup>/m<sup>2</sup>)</b>  | > Q1       | Ref.                 |              | Ref.                     |              |
|                                                          | ≤ Q1       | 3.90 (1.01 – 15.05)  | <b>0.048</b> | 3.44 (0.85 – 13.99)      | 0.084        |
| <b>Long spine muscle, (cm<sup>2</sup>/m<sup>2</sup>)</b> | Continuous | 0.97 (0.93 – 1.01)   | 0.094        | 0.97 (0.92 – 1.01)       | 0.117        |
| <b>Long spine muscle, (cm<sup>2</sup>/m<sup>2</sup>)</b> | > Q1       | Ref.                 |              | Ref.                     |              |
|                                                          | ≤ Q1       | 2.27 (0.77 – 6.70)   | 0.137        | 1.98 (0.68 - 5.74)       | 0.211        |

\* Adjusted by Gender  
\*\* Adjusted by Age, Gender, Stage, ECOG, n. of meds

| B                                                     |            | Bivariable analysis* |              | Multivariable analysis** |              |
|-------------------------------------------------------|------------|----------------------|--------------|--------------------------|--------------|
| Continuous and categorical variables                  |            | aOR (95%CI)          | P value      | aOR (95%CI)              | P value      |
| SMI-L3, (cm <sup>2</sup> /m <sup>2</sup> )            | Continuous | 0.93 (0.89 – 0.98)   | <b>0.011</b> | 0.92 (0.87 – 0.97)       | <b>0.006</b> |
| Sarcopenic status, by SMI-L3                          | No         | Ref.                 |              | Ref.                     |              |
|                                                       | Yes        | 2.00 (0.86 – 4.68)   | 0.106        | 2.31 (1.15 – 5.78)       | <b>0.038</b> |
| Subcutaneous fat, (cm <sup>2</sup> /m <sup>2</sup> )  | Continuous | 0.99 (0.98 – 0.99)   | <b>0.041</b> | 0.99 (0.98 – 0.99)       | <b>0.028</b> |
| Subcutaneous fat, (cm <sup>2</sup> /m <sup>2</sup> )  | > Q1       | Ref.                 |              | Ref.                     | 0.214        |
|                                                       | ≤ Q1       | 1.87 (0.71 – 4.90)   | 0.199        | 1.87 (0.69 – 5.07)       |              |
| Visceral fat, (cm <sup>2</sup> /m <sup>2</sup> )      | Continuous | 0.99 (0.99 – 1.00)   | 0.080        | 0.99 (0.98 – 1.00)       | 0.066        |
| Visceral fat, (cm <sup>2</sup> /m <sup>2</sup> )      | > Q1       | Ref.                 |              | Ref.                     |              |
|                                                       | ≤ Q1       | 2.71 (0.92 – 7.93)   | 0.068        | 2.77 (0.89 – 8.54)       | 0.076        |
| Psoas muscle, (cm <sup>2</sup> /m <sup>2</sup> )      | Continuous | 0.84 (0.74 – 0.94)   | <b>0.005</b> | 0.84 (0.74 – 0.96)       | <b>0.009</b> |
| Psoas muscle, (cm <sup>2</sup> /m <sup>2</sup> )      | > Q1       | Ref.                 |              | Ref.                     |              |
|                                                       | ≤ Q1       | 3.09 (0.91 – 10.51)  | 0.070        | 2.84 (0.80 – 10.1)       | 0.106        |
| Abdominal muscle, (cm <sup>2</sup> /m <sup>2</sup> )  | Continuous | 0.96 (0.93 – 0.99)   | <b>0.007</b> | 0.95 (0.93 – 0.98)       | <b>0.005</b> |
| Abdominal muscle, (cm <sup>2</sup> /m <sup>2</sup> )  | > Q1       | Ref.                 |              | Ref.                     |              |
|                                                       | ≤ Q1       | 3.90 (1.01 – 15.05)  | <b>0.048</b> | 3.72 (0.92 – 15.01)      | 0.064        |
| Long spine muscle, (cm <sup>2</sup> /m <sup>2</sup> ) | Continuous | 0.95 (0.91 – 0.99)   | 0.050        | 0.95 (0.91 – 1.00)       | 0.053        |
| Long spine muscle, (cm <sup>2</sup> /m <sup>2</sup> ) | > Q1       | Ref.                 |              | Ref.                     |              |
|                                                       | ≤ Q1       | 2.27 (0.77 – 6.70)   | 0.137        | 2.67 (0.85 – 8.34)       | 0.090        |

\* Adjusted by Gender  
\*\* Adjusted by Age, Gender, Stage, ECOG, n. of meds

**Tables S2 A-B** Bivariable and Multivariable adjusted Cox regression modeling for anthropometric measures assessing the hazard for overall survival at baseline (A) and post-systemic treatment (B).

aHR: adjusted hazard ratio; CI: confidence interval; SMI: skeletal muscle index; Q: quartile; ECOG: Eastern Cooperative Oncology Group

| A                                                     |            | Bivariable analysis* |              | Multivariable analysis** |              |
|-------------------------------------------------------|------------|----------------------|--------------|--------------------------|--------------|
| Continuous and categorical variables                  |            | aHR (95%CI)          | P value      | aHR (95%CI)              | P value      |
| SMI-L3, (cm <sup>2</sup> /m <sup>2</sup> )            | Continuous | 0.96 (0.92 – 0.98)   | <b>0.005</b> | 0.95 (0.92 – 0.99)       | <b>0.007</b> |
| Sarcopenic status, by SMI-L3                          | No         | Ref.                 |              |                          |              |
|                                                       | Yes        | 3.31 (1.56 – 7.04)   | <b>0.002</b> | 3.79 (1.71 - 8.40)       | <b>0.001</b> |
| Subcutaneous fat, (cm <sup>2</sup> /m <sup>2</sup> )  | Continuous | 1.02 (0.96 – 1.11)   | 0.169        | 0.99 (0.99 - 1.001)      | 0.164        |
| Subcutaneous fat, (cm <sup>2</sup> /m <sup>2</sup> )  | > Q1       | Ref.                 |              | Ref.                     |              |
|                                                       | ≤ Q1       | 1.29 (0.60 – 2.78)   | 0.506        | 1.26 (0.58 – 2.73)       | 0.551        |
| Visceral fat, (cm <sup>2</sup> /m <sup>2</sup> )      | Continuous | 0,99 (0,98 - 1,02)   | 0.053        | 0.99 (0.99 – 1.00)       | 0.072        |
| Visceral fat, (cm <sup>2</sup> /m <sup>2</sup> )      | > Q1       | Ref.                 |              | Ref.                     |              |
|                                                       | ≤ Q1       | 1.84 (0.89 – 3.79)   | 0.098        | 1.74 (0.82 – 3.69)       | 0.146        |
| Psoas muscle, (cm <sup>2</sup> /m <sup>2</sup> )      | Continuous | 0.91 (0.85 – 0.97)   | <b>0.007</b> | 0.90 (0.84 – 0.97)       | <b>0.010</b> |
| Psoas muscle, (cm <sup>2</sup> /m <sup>2</sup> )      | > Q1       | Ref.                 |              | Ref.                     |              |
|                                                       | ≤ Q1       | 2.03 (1.01 – 4.08)   | <b>0.047</b> | 1.98 (1.16 – 4.08)       | <b>0.049</b> |
| Abdominal muscle, (cm <sup>2</sup> /m <sup>2</sup> )  | Continuous | 0.98 (0.98 – 0.99)   | <b>0.023</b> | 0.98 (0.96 – 0.99)       | <b>0.031</b> |
| Abdominal muscle, (cm <sup>2</sup> /m <sup>2</sup> )  | > Q1       | Ref.                 |              | Ref.                     |              |
|                                                       | ≤ Q1       | 2.10 (0.95 – 4.62)   | 0.064        | 2.01 (0.88 – 4.58)       | 0.096        |
| Long spine muscle, (cm <sup>2</sup> /m <sup>2</sup> ) | Continuous | 0.96 (0.93 – 1.00)   | 0.053        | 0.96 (0.93 – 1.00)       | 0.068        |
| Long spine muscle, (cm <sup>2</sup> /m <sup>2</sup> ) | > Q1       | Ref.                 |              | Ref.                     |              |
|                                                       | ≤ Q1       | 1.68 (0.81 – 3.49)   | 0.160        | 1.68 (0.79 – 3.57)       | 0.175        |

\*Adjusted by Gender

\*\*Adjusted by Age, Gender, Stage, ECOG, n. of meds

| B                                                     |            | Bivariable analysis |              | Multivariable analysis* |              |
|-------------------------------------------------------|------------|---------------------|--------------|-------------------------|--------------|
| Continuous and categorical variables                  |            | aHR (95%CI)         | P value      | aHR (95%CI)             | P value      |
| SMI-L3, (cm2/m <sup>2</sup> )                         | Continuous | 0.95 (0.91 – 0.98)  | <b>0.008</b> | 0.94 (0.91 – 0.98)      | <b>0.009</b> |
| Sarcopenic status, by SMI-L3                          | no         | Ref.                |              | Ref.                    |              |
|                                                       | yes        | 2.81 (1.35 – 5.83)  | <b>0.005</b> | 3.29 (1.51 – 7.16)      | <b>0.003</b> |
| Subcutaneous fat, (cm <sup>2</sup> /m <sup>2</sup> )  | Continuous | 0.99 (0.41 – 1.001) | 0.585        | 0.99 (0.99 – 1.001)     | 0.171        |
| Subcutaneous fat, (cm <sup>2</sup> /m <sup>2</sup> )  | > Q1       | Ref.                |              | Ref.                    |              |
|                                                       | ≤ Q1       | 1.95 (0.98 – 3.88)  |              | 2.02 (1.00 – 4.06)      | <b>0.048</b> |
| Visceral fat, (cm <sup>2</sup> /m <sup>2</sup> )      | Continuous | 0.99 (0.99 – 1.001) | 0.080        | 0.99 (0.99 – 1.001)     | 0.221        |
| Visceral fat, (cm <sup>2</sup> /m <sup>2</sup> )      | > Q1       | Ref.                |              | Ref.                    |              |
|                                                       | ≤ Q1       | 1.34 (0.62 – 2.91)  | 0.445        | 1.23 (0.55 – 2.74)      | 0.598        |
| Psoas muscle, (cm <sup>2</sup> /m <sup>2</sup> )      | Continuous | 0.91 (0.84 – 0.99)  | <b>0.043</b> | 0.90 (0.83 – 0.98)      | <b>0.046</b> |
| Psoas muscle, (cm <sup>2</sup> /m <sup>2</sup> )      | > Q1       | Ref.                |              | Ref.                    |              |
|                                                       | ≤ Q1       | 1.20 (0.50 – 2.83)  | 0.675        | 1.14 (0.47 – 2.75)      | 0.768        |
| Abd. muscle, (cm <sup>2</sup> /m <sup>2</sup> )       | Continuous | 0.97 (0.96 – 0.99)  | <b>0.028</b> | 0.97 (0.96 – 0.99)      | <b>0.032</b> |
| Abd. muscle, (cm <sup>2</sup> /m <sup>2</sup> )       | > Q1       | Ref.                |              | Ref.                    |              |
|                                                       | ≤ Q1       | 1.97 (0.87 – 4.45)  | 0.100        | 1.89 (0.82 – 4.39)      | 0.133        |
| Long spine muscle, (cm <sup>2</sup> /m <sup>2</sup> ) | Continuous | 0.97 (0.93 – 1.00)  | 0.135        | 0.97 (0.93 – 1.001)     | 0.154        |
| Long spine muscle, (cm <sup>2</sup> /m <sup>2</sup> ) | > Q1       | Ref.                |              | Ref.                    |              |
|                                                       | ≤ Q1       | 1.10 (0.49 – 2.49)  | 0.803        | 1.13 (0.49 – 2.57)      | 0.768        |
| *Adjusted by Gender                                   |            |                     |              |                         |              |
| **Adjusted by Age, Gender, Stage, ECOG, n. of meds    |            |                     |              |                         |              |
